# Supplementary material for: Incorporated O-CoP nanosheets with an O–P interpenetrated interface as electrocatalytic cathodes for rechargeable Li–CO2batteries
Source: Royal Society of Chemistry journal article supplement (doi:10.1039/d2nj04248g), 2022-01-01
Supplement: d2nj04248g1.pdf [file d2nj04248g1.pdf]

## Supporting information

### **Incorporated O-CoP nanosheets with an O-P interpenetrated interface as electrocatalytic cathodes for rechargeable Li-CO<sub>2</sub> batteries**

Siyu Qu,<sup>a</sup> Wenjie Wang,<sup>a</sup> Zhengfa Ju,<sup>b</sup> Qinghua Deng,<sup>a</sup> Wentian Zhao,<sup>a</sup> Zhao Fang,<sup>a</sup> Wuwei Yan,<sup>c</sup>  
Yong Yang<sup>\*a</sup>

<sup>a</sup>School of Chemistry and Chemical Engineering, Nanjing University of Science and Technology, Nanjing 210094, PR China

<sup>b</sup>Changzhou SynTheAll Pharmaceutical Co., Ltd, Changzhou, 213127, PR China

<sup>c</sup>Shenzhen BTR Nanotechnology Co., Ltd., Shenzhen, 518106, PR China

\*Corresponding author. E-mail address: [ychem@njust.edu.cn](mailto:ychem@njust.edu.cn) (Y. Yang)

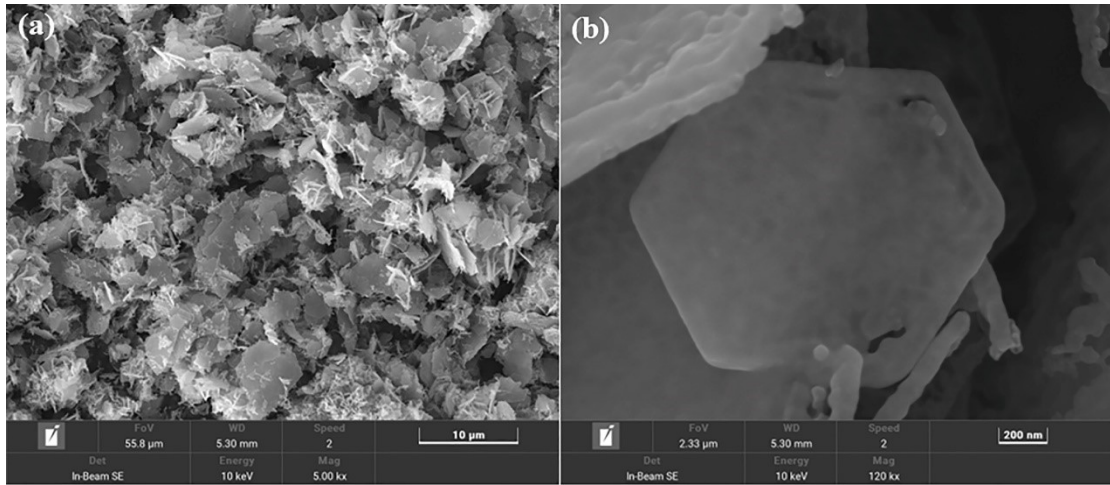

**Fig. S1** The SEM images of O-CoP-2h nanosheets.

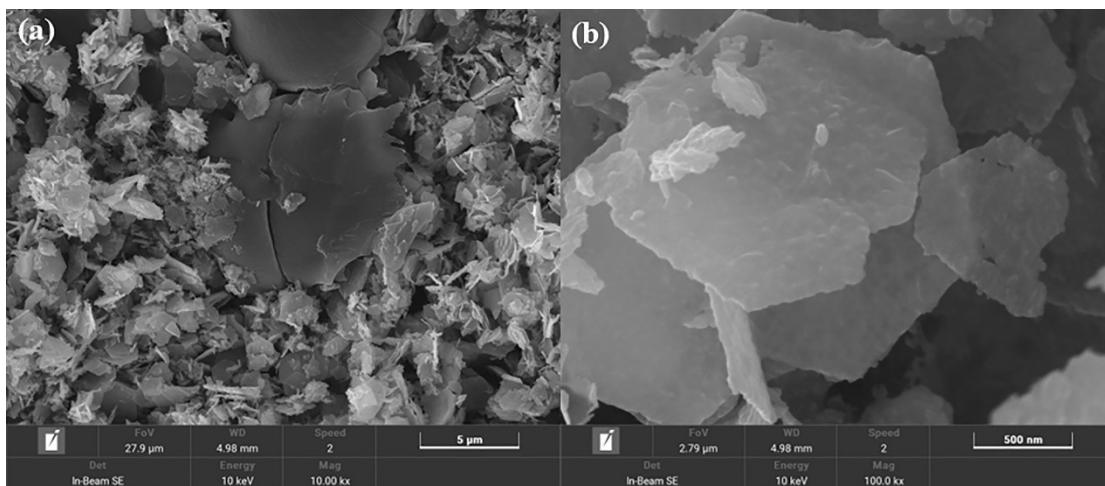

**Fig. S2** The SEM images of O-CoP-4h nanosheets.

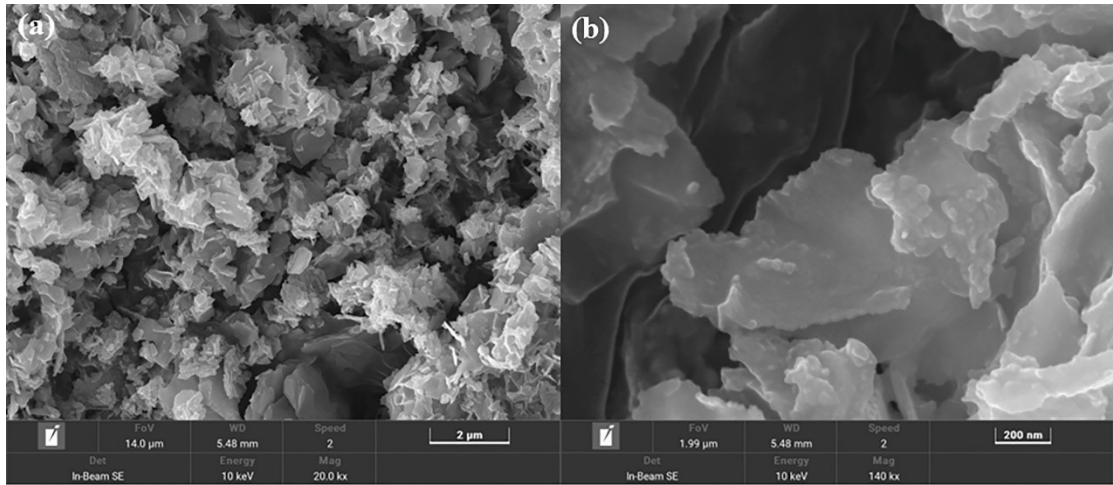

**Fig. S3** The SEM images of O-CoP-5h nanosheets.

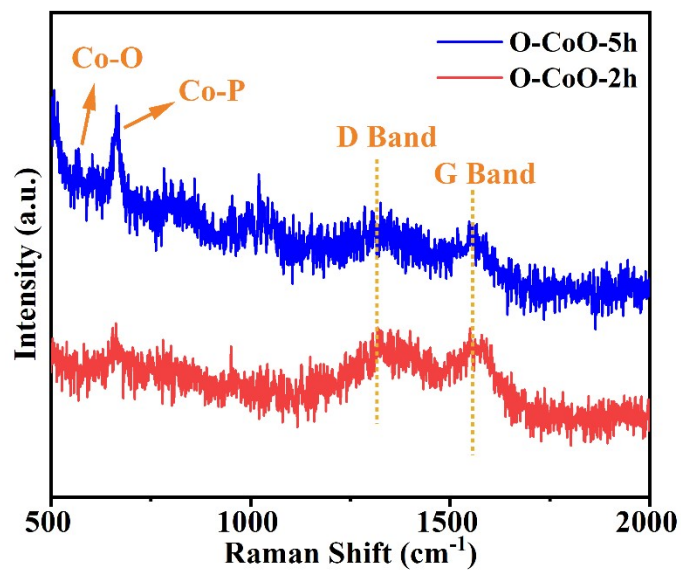

**Fig. S4** The Raman tests of O-CoP at different calcination time. It can be seen from the figure that when the calcination time is increased, an obvious characteristic peak at 566 cm<sup>-1</sup> will appear, which belongs to the Co-O peak, compared with the short-time calcination. This change corroborates that the calcination time can promote the construction of Co-O bonds.

**Table S1.** Performance comparison of typical reported cathode catalysts for Li-CO<sub>2</sub> batteries.

| Cathode                              | Current density<br>(mA g <sup>-1</sup> ) | Capacity<br>(mAh g <sup>-1</sup> ) | Total usage of<br>active substance | Cycling<br>stability | Ref.             |
|--------------------------------------|------------------------------------------|------------------------------------|------------------------------------|----------------------|------------------|
| MnOOH                                | 300                                      | ~7300                              | 0.3 mg                             | 138                  | [1]              |
| W <sub>2</sub> C-CNTs                | 100                                      | 10632                              | 0.34 mg                            | 75                   | [2]              |
| RuO <sub>2</sub> /CoSnO <sub>3</sub> | 100                                      | 6000                               | 2 mg                               | 140                  | [3]              |
| NiO                                  | 100                                      | 11231                              | 0.4 mg                             | 159                  | [4]              |
| Ti <sub>3</sub> C <sub>2</sub> -CNT  | 200                                      | 11458                              | ~0.5 mg                            | 100                  | [5]              |
| Ru(bpy) <sub>3</sub> Cl              | 200                                      | 22119                              | ~0.13 mg                           | 60                   | [6]              |
| Cu <sub>2</sub> O                    | 100                                      | 6235                               | ~0.5mg                             | 50                   | [7]              |
| IrO <sub>2</sub> -CNT                | 100                                      | 4634                               | ~0.2 mg                            | 316                  | [8]              |
| COFs                                 | 100                                      | 1000                               | 0.15 mg                            | 30                   | [9]              |
| MnO                                  | 50                                       | 25000                              | 0.3 mg                             | 15                   | [10]             |
| <b>Mn-CeO<sub>2</sub>@PPy</b>        | <b>100 mA/g</b>                          | <b>13500</b>                       | <b>~0.35 mg</b>                    | <b>&gt;50</b>        | <b>This work</b> |

## Supplementary references

- [1] S. Ma, Y. Lu, H. Yao, Y. Si, Q. Liu and Z. Li, *J. Energy Chem.* **2022**, *65*, 472.
- [2] X. Zhang, T. Wang, Y. Yang, X. Zhang, Z. Lu, J. Wang, C. Sun, Y. Diao, X. Wang and J. Yao, *ACS Energy Lett.* **2021**, *6*, 3503.
- [3] G. Yue, X. Luo, Z. Hu, W. Xu, J. Li, J. Liu, R. Cao, *Chem. Comm.* **2020**, *56*, 11693-11696.
- [4] C. Wang, Y. Lu, S. Lu, S. Ma, X. Zhu, Z. Li and Q. Liu, *J. Power Sources* **2021**, *495*, 229782.
- [5] Z. Hu, Y. Xie, D. Yu, Q. Liu, L. Zhou, K. Zhang, P. Li, F. Hu, L. Li, S. Chou and S. Peng, *ACS Nano* **2021**, *15*, 8407.
- [6] Z. Zhang, W. L. Bai, Z. P. Cai, J. H. Cheng, H. Y. Kuang, B. X. Dong, Y. B. Wang, K. X. Wang and J. S. Chen, *Angew. Chem., Int. Ed.* **2021**, *60*, 1.
- [7] A. Jena, H.C. Hsieh, S. Thoka, S.F. Hu, H. Chang, R.S. Liu, *ChemSusChem* **2021**, *13*, 2719.
- [8] G. Wu, X. Li, Z. Zhang, P. Dong, M. Xu, H. Peng, X. Zeng, Y. Zhang and S. Liao, *J. Mater. Chem. A* **2020**, *8*, 3763.
- [9] Y. Zhang, M. Lu, J.H. Wang, C. Jiang, G.K. Gao, L.Z. Dong, Y. Chen, S.L. Li, Y.Q. Lan, *ACS Cent. Sci.* **2020**, *7*, 175-182.
- [10] S. Li, Y. Liu, J. Zhou, S. Hong, Y. Dong, J. Wang, X. Gao, P. Qi, Y. Han and B. Wang, *Energy Environ. Sci.* **2019**, *12*, 1046.
